# Supplementary material
Source: publisher site journal article supplement (https://www.dovepress.com/article/408572)
Supplement: Supplementary file 1 [file get_supplementary_file.php]

Supplementary Table 1 Probability target attainment of 100%fT > MIC of varying MIC values

| Rena function  MICs | 0.25 | 0.5 | 1 | 2 | 4 | 8 | 16 | 32 |
| --- | --- | --- | --- | --- | --- | --- | --- | --- |
| All | 0.73 | 0.59 | 0.54 | 0.49 | 0.41 | 0.27 | 0 | 0 |
| normal renal function | 0.4 | 0.2 | 0.2 | 0 | 0 | 0 | 0 | 0 |
| mild renal impairment | 0.6 | 0.4 | 0.2 | 0.2 | 0.2 | 0 | 0 | 0 |
| moderate renal impairment | 0.71 | 0.57 | 0.43 | 0.43 | 0.14 | 0 | 0 | 0 |
| severe renal impairment | 0.85 | 0.75 | 0.75 | 0.7 | 0.65 | 0.5 | 0 | 0 |

Supplementary Table 2 Probability target attainment of 40%fT > MIC of varying MIC values

| Rena function  MICs | 0.25 | 0.5 | 1 | 2 | 4 | 8 | 16 | 32 |
| --- | --- | --- | --- | --- | --- | --- | --- | --- |
| All | 1 | 1 | 0.97 | 0.89 | 0.86 | 0.73 | 0.65 | 0.43 |
| normal renal function | 1 | 1 | 1 | 0.8 | 0.8 | 0.4 | 0.2 | 0 |
| mild renal impairment | 1 | 1 | 1 | 0.6 | 0.6 | 0.2 | 0.2 | 0 |
| moderate renal impairment | 1 | 1 | 0.86 | 0.86 | 0.86 | 0.71 | 0.43 | 0.29 |
| severe renal impairment | 1 | 1 | 1 | 1 | 0.95 | 0.95 | 0.95 | 0.7 |
